# Supplementary material
Source: PubMed Central journal article supplement (PMC4289427)
Supplement: NIHMS617825-supplement-Supp_FigureS1-S2.pdf [file NIHMS617825-supplement-Supp_FigureS1-S2.pdf]

**A**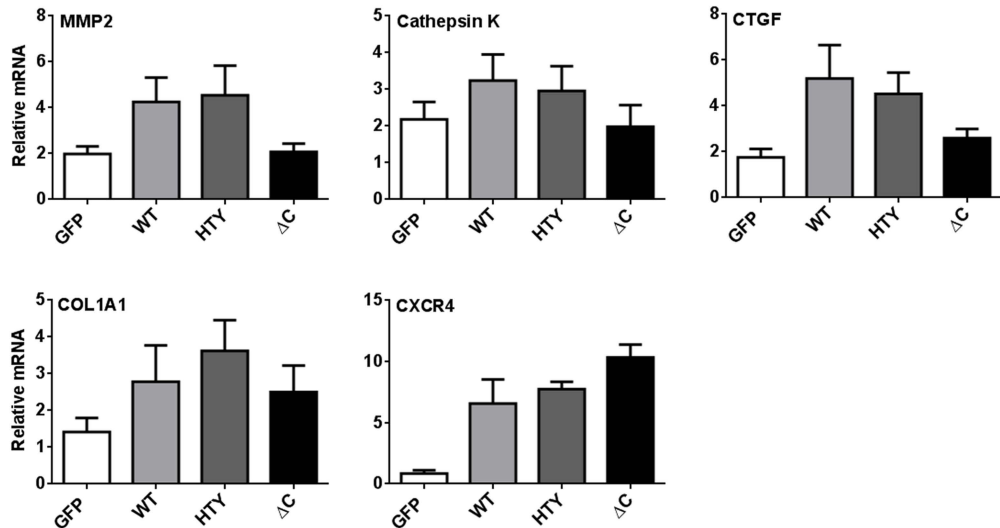**B**

| GENES      | MMP2 | Cathepsin K | CTGF               | COL1A1 | CXCR4                |
|------------|------|-------------|--------------------|--------|----------------------|
| GFP vs WT  | 0.04 | NS          | $7 \times 10^{-3}$ | NS     | $8.8 \times 10^{-4}$ |
| GFP vs HTY | 0.03 | NS          | 0.01               | 0.05   | $4.4 \times 10^{-4}$ |
| GFP vs ΔC  | NS   | NS          | NS                 | NS     | $1.2 \times 10^{-4}$ |
| WT vs ΔC   | 0.05 | NS          | NS                 | NS     | NS                   |
| WT vs HTY  | NS   | NS          | NS                 | NS     | NS                   |
| HTY vs ΔC  | 0.04 | NS          | NS                 | NS     | NS                   |

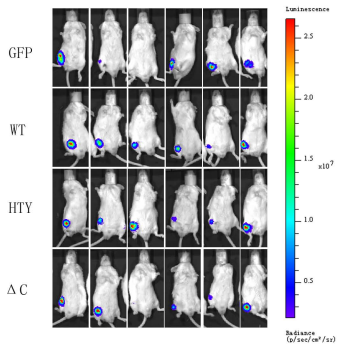

week1

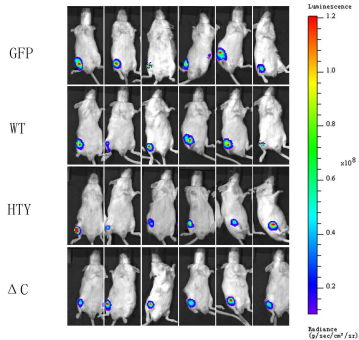

week2

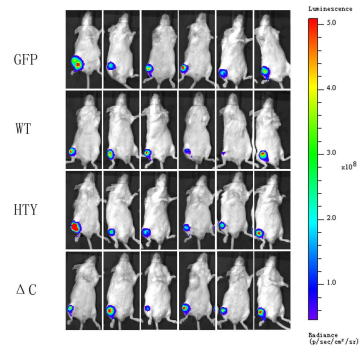

week3

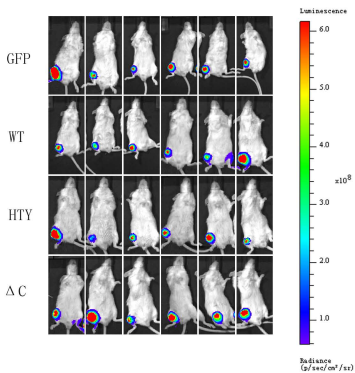

week4

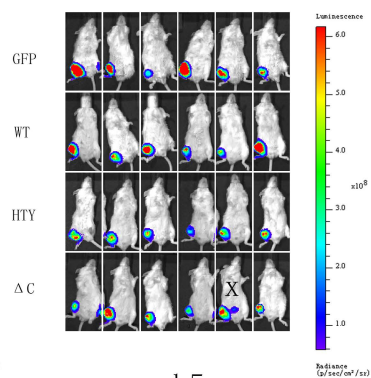

week5

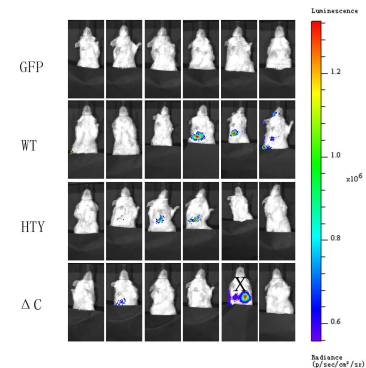

week5 metastasis
